# Supplementary material for: Human Adipose Tissue-Derived Stromal/Stem Cells Promote Migration and Early Metastasis of Triple Negative Breast Cancer Xenografts
Source: PubMed Central journal article supplement (PMC3938488; doi:10.1371/journal.pone.0089595), 2014-02-28
Supplement: pone.0089595.s003.pdf [file pone.0089595.s003.pdf]

A. MDA-MB-231/GFP

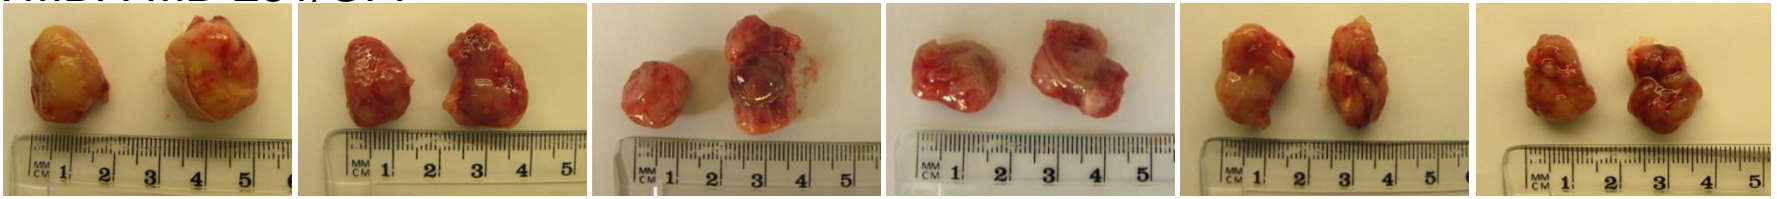

MDA-MB-231/GFP + ASC/RFP donor BMI 25.0

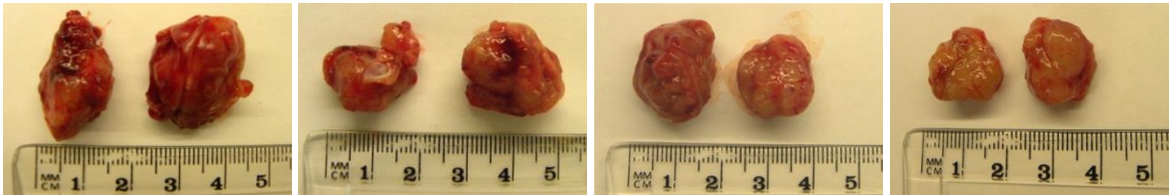

B. MDA-MB-231/GFP

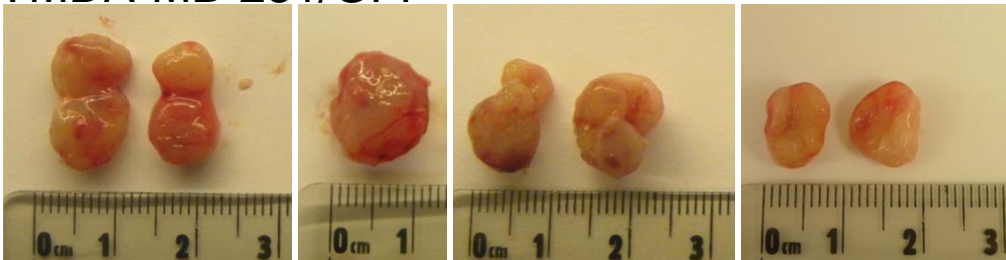

MDA-MB-231/GFP + ASC/RFP donor BMI 18.3

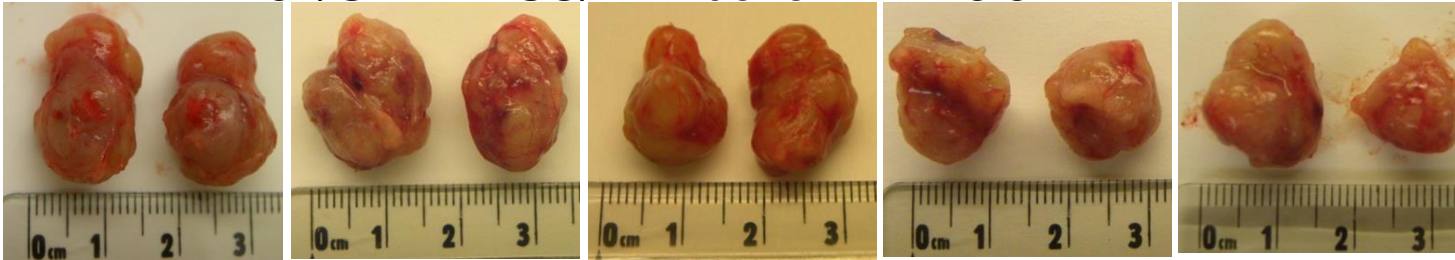

Figure S3
