# Supplementary material for: Human Adipose Tissue-Derived Stromal/Stem Cells Promote Migration and Early Metastasis of Triple Negative Breast Cancer Xenografts
Source: PubMed Central journal article supplement (PMC3938488; doi:10.1371/journal.pone.0089595), 2014-02-28
Supplement: pone.0089595.s004.pdf [file pone.0089595.s004.pdf]

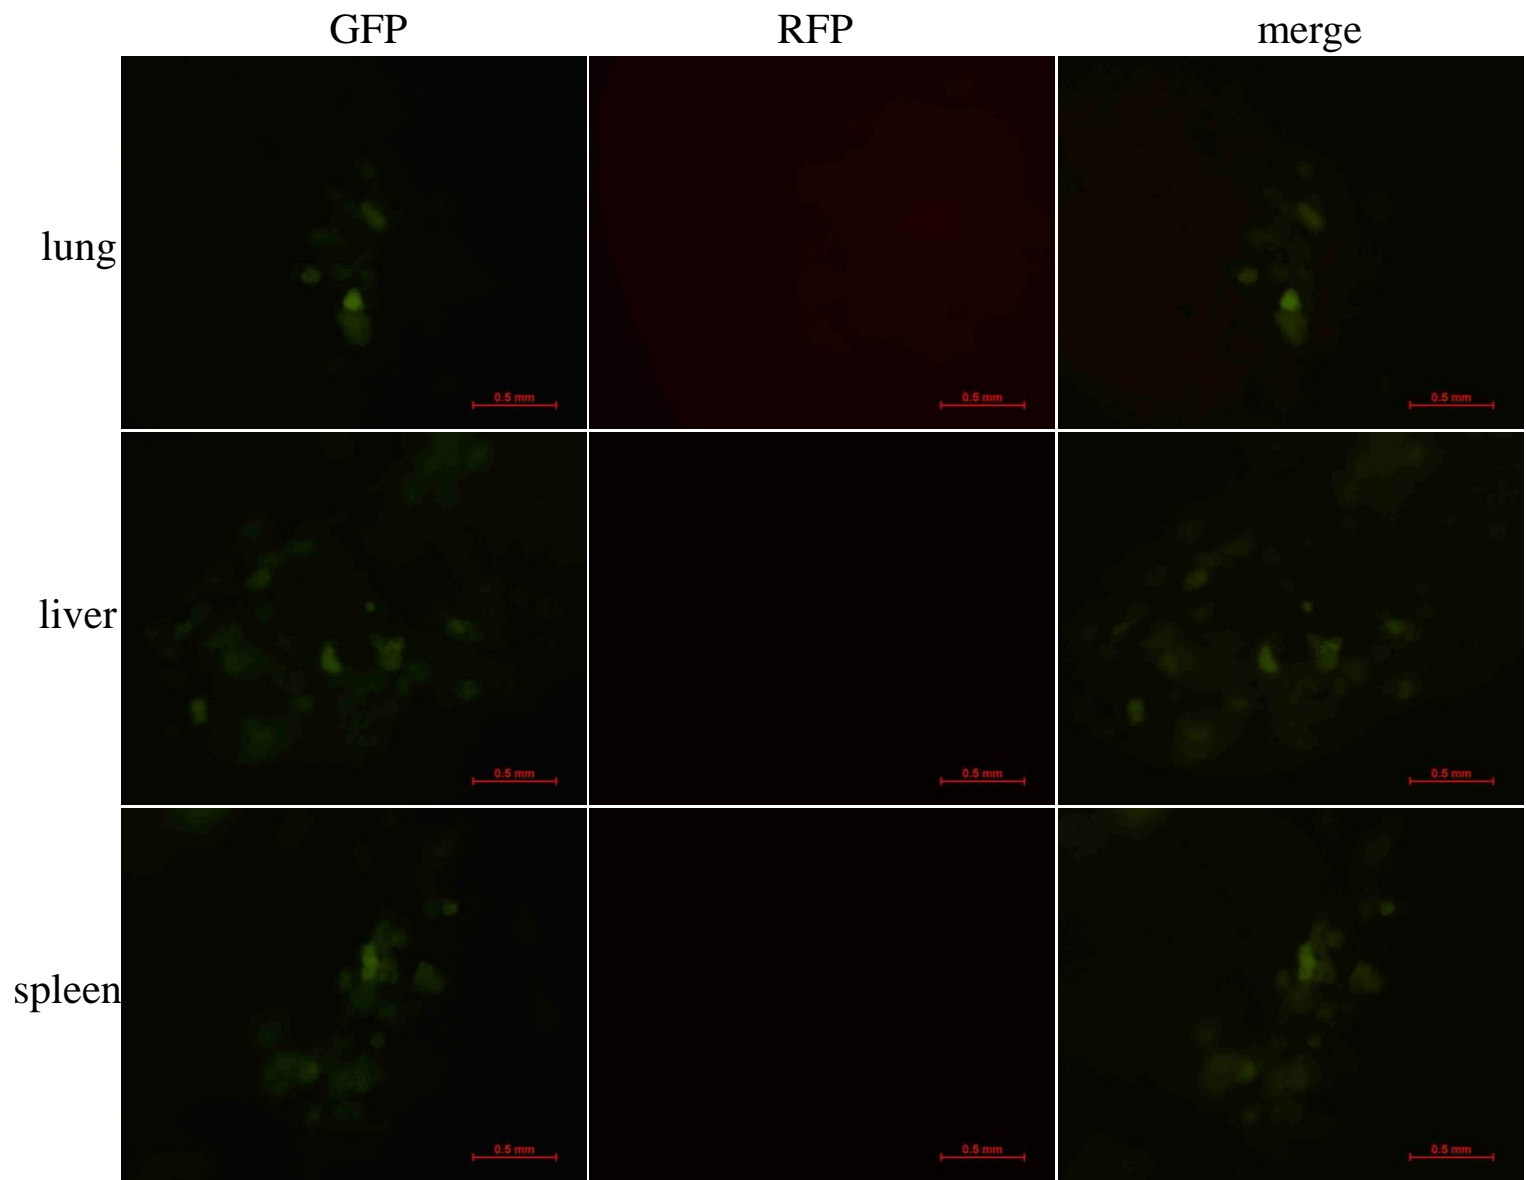

Figure S4
